# 1 **Functional Testing of Thousands of Osteoarthritis-Associated Variants for Regulatory** 2 **Activity**

3  
4 Jason Chesler Klein<sup>1\*#</sup>, Aidan Keith<sup>1\*</sup>, Sarah J. Rice<sup>2</sup>, Colin Shepherd<sup>2</sup>, John Loughlin<sup>2</sup>, Jay  
5 Shendure<sup>1,3,4#</sup>

6 \*authors contributed equally

- 7  
8 1. Department of Genome Sciences, University of Washington, Seattle, WA 98195  
9 2. Skeletal Research Group, Institute of Genetic Medicine, Newcastle University,  
10 International Centre for Life, Newcastle-upon-Tyne, NE1 3BZ, UK  
11 3. Brotman Baty Institute for Precision Medicine, Seattle, WA 98195  
12 4. Howard Hughes Medical Institute, University of Washington, Seattle, WA 98195

13  
14 # Correspondence to [jcklein@uw.edu](mailto:jcklein@uw.edu) and [shendure@uw.edu](mailto:shendure@uw.edu)

## 15 16 **Abstract**

17  
18 To date, genome-wide association studies have implicated at least 35 loci in osteoarthritis, but  
19 due to linkage disequilibrium, we have yet to pinpoint the specific variants that underlie these  
20 associations, nor the mechanisms by which they contribute to disease risk. Here we functionally  
21 tested 1,605 single nucleotide variants associated with osteoarthritis for regulatory activity using  
22 a massively parallel reporter assay. We identified six single nucleotide polymorphisms (SNPs)  
23 with differential regulatory activity between the major and minor alleles. We show that our most  
24 significant hit, rs4730222, drives increased expression of an alternative isoform of *HBPI* in a  
25 heterozygote chondrosarcoma cell line, a CRISPR-edited osteosarcoma cell line, and in  
26 chondrocytes derived from osteoarthritis patients.

## 27 28 **Main text**

29  
30 Genome-wide association studies (GWAS) have successfully implicated thousands of genetic  
31 loci in common human diseases. Most of the underlying signal is believed to derive from  
32 variation in non-coding regulatory sequences. However, because of linkage disequilibrium (LD),  
33 it has been extraordinarily challenging for the field to identify the variants that causally underlie  
34 each association.

35  
36 Over the past decade, we and others developed massively parallel reporter assays (MPRAs) to  
37 increase the throughput at which regulatory sequences can be tested for functional potential<sup>1-4</sup>.  
38 An MPRA involves cloning thousands of candidate regulatory sequences to a single reporter  
39 gene, transfecting them to a cell line *en masse*, and performing deep sequencing of the resulting  
40 transcripts to quantify the degree of transcriptional activation mediated by each candidate

41 regulatory sequence. MPRA have previously been applied to characterize variants underlying  
42 eQTLs (in LCLs)<sup>5</sup>, red blood cell traits (in K562 and human erythroid progenitors/precursors)<sup>6</sup>,  
43 cancer-associated common variants (in HEK293 cells)<sup>7</sup>, and adiposity-associated common  
44 variants (in HepG2 cells)<sup>8</sup>.

45  
46 Here we sought to apply an MPRA (specifically, STARR-seq<sup>4</sup>) to quantify the relative regulatory  
47 potential of SNPs residing on haplotypes implicated in osteoarthritis (OA), with the aim of  
48 pinpointing causal variants. We compiled a list of 35 lead SNPs associated with OA in  
49 Europeans via GWAS, with minor allele frequencies over 5%<sup>9-26</sup>. Each SNP represents an  
50 independent signal with  $p < 5e-8$  (genome-wide significant;  $n=20$ ) or  $p < 5e-5$  (genome-wide  
51 suggestive;  $n=15$ ) (**Table S1**). We identified all SNPs in LD with an  $r^2 > 0.8$  in Europeans using  
52 rAggr (**Fig. 1A**), resulting in a list of 1,605 candidate SNPs. For the major and minor allele of  
53 each SNP, we synthesized 196 nt of genomic sequence, centered on the SNP and flanked by  
54 adaptor sequences, on a microarray (230 nt oligos; **Fig. 1B**).

55  
56 During PCR amplification of array-derived oligos, we appended 5 nt degenerate barcodes (**Fig.**  
57 **1C**), such that each allele would be represented by multiple independent measurements in the  
58 subsequent experiment. We then cloned these barcoded oligos into the human STARR-seq  
59 vector and transfected Saos-2 cells, an osteosarcoma cell line. In STARR-seq, the candidate  
60 regulatory sequences are located within the transcript itself (**Fig. 1D**). From the transfected Saos-  
61 2 cells, we extracted, amplified and sequenced both DNA and RNA corresponding to the cloned  
62 region, and then calculated activity scores as the normalized  $\log_2$  (ratio of RNA reads / ratio of  
63 DNA reads) for each barcode-allele combination (**Fig. 1E-F**). For all alleles with greater than  
64 five independent measurements over three biological replicates (independent transfections of the  
65 same library), we averaged the allele activity scores to a single value. Due to bottlenecking  
66 during library construction, some alleles were under sampled and therefore excluded from  
67 further analysis. Altogether, we obtained activity scores for 1,953 of 3,210 alleles (61%), and  
68 activity scores for both alleles of 752 of 1,605 SNPs (47%).

69  
70 We first asked whether these STARR-seq-based activity scores correlated with biochemical  
71 marks for putative enhancers. For this analysis, activity scores corresponding to two alleles of the  
72 same SNP were collapsed. We ranked and split the resulting 1,203 activity scores for distinct  
73 genomic sequences into quintiles, and then intersected these with datasets of biochemical marks  
74 of putative enhancers in cartilage and bone (H3K27ac in bone marrow-derived chondrocytes,  
75 H3K27ac in human embryonic limb buds, and ATAC-seq in knee OA cartilage)<sup>27,28</sup>  
76 (**Supplementary Fig. 1**). The highest scoring quintile was significantly enriched for overlap with  
77 H3K27ac ChIP-seq peaks in embryonic limb bud from E41 (2.1-fold, Bonferroni-corrected chi-  
78 square  $p=0.0096$ ), E44 (1.8-fold,  $p=0.044$ ), and E47 (2.0-fold,  $p=0.0072$ ), but not with knee OA  
79 cartilage ATAC-seq peaks nor bone marrow-derived chondrocyte H3K27ac peaks. These results  
80 are in line with our use of an osteosarcoma rather than a cartilage-derived cell line. The highest

81 scoring quintile includes 240 genomic regions, 67 of which overlap putative enhancers from at  
82 least one dataset. In contrast, the least active quintile includes 239 genomic regions, only 37 of  
83 which overlap putative enhancers from at least one dataset (1.8-fold difference, chi-square  
84  $p=9.7e-4$ ). Altogether, these enrichments demonstrate that at least a subset of the 1,605 genomic  
85 regions tested here correspond to enhancers in OA-relevant tissues. All activity scores are  
86 included in **Table S2**.

87  
88 We next sought to ask whether any alleles are differentially active, focusing on the 752 SNPs for  
89 which we successfully measured activity scores for both alleles (**Table S3**). Overall, activity  
90 scores for two alleles of a given SNP were highly correlated, with an overall Spearman  
91 correlation of 0.96 (**Fig. 1G**). This was reassuring, given that each pair of alleles was separately  
92 synthesized and cloned, and therefore at non-identical abundances in the STARR-seq library.  
93 After correcting for multiple testing with Benjamini-Hochberg (BH) at a 5% FDR, we identified  
94 6 SNPs whose alleles demonstrated significantly differential functional activity in Saos-2 cells  
95 (**Fig. 1G, Table S3**). The most significant SNP, rs4730222, is located in the 5' UTR of several  
96 non-canonical isoforms of HMG-Box Transcription Factor 1 (*HBPI*). Other significant SNPs  
97 include rs80095766 (intronic to *COG5*), rs2286798 (intronic to *ITIH1*), rs11745630 (downstream  
98 of *PIK3R1*), rs6976 (3' UTR of *GLT8D1*), and rs1563351 (intronic to *LOC102723886*). Two  
99 pairs of the six significant SNPs are at the same loci (the ones near *HBPI* and *COG5*, both at  
100 chromosome 7q22.3; and the ones near *ITIH1* and *GLT8D1*, both at chromosome 3p21.1).

101  
102 We chose to further characterize rs4730222 for several reasons. First, this SNP was the most  
103 significant hit from our reporter assay, with a substantial difference in activity between the two  
104 alleles (2.5-fold increased expression of the minor, disease-associated allele, BH adjusted p-  
105 value= $2.4e-6$ ). Second, it overlaps several marks for active regulatory elements. Third, we have  
106 previously observed reduced expression of the canonical *HBPI* transcript in relevant tissues from  
107 carriers of the OA-associated allele<sup>29</sup>, interestingly opposite the effect observed here. *HBPI* is a  
108 transcriptional repressor that regulates the Wnt-beta-catenin pathway as well as superoxide  
109 production, both of which have been implicated in OA development and progression<sup>30,31,32</sup>.

110  
111 rs4730222 overlaps with several marks associated with active regulatory DNA: H3K27ac (mark  
112 for active enhancers and promoters) from bone marrow-derived chondrocytes<sup>28</sup>, human  
113 embryonic limb bud at E33, E41, E44 and E47<sup>27</sup>, and ENCODE layered data, H3K4me3 (mark  
114 for active promoters) in ENCODE layered data, and ATAC-seq (mark for open chromatin) peaks  
115 from articular knee cartilage of OA patients<sup>33</sup> (**Fig. 2A**). *HBPI* contains several transcript  
116 isoforms, with three probable alternative promoters identified from cap-selected clones and nine  
117 validated alternative polyadenylation sites<sup>34</sup>. One of the three probable alternative promoters  
118 contains rs4730222 at position +80 relative to the alternative TSS. We therefore hypothesized  
119 that the variant may alter expression of this or another *HBPI* isoform. To test this, we first  
120 confirmed that the alternative TSS overlapping rs4730222 is utilized in Saos2 and SW1353 cells

121 (a chondrosarcoma cell line) with qRT-PCR with primers contained within this 5' UTR as well  
122 as spanning to the following exon. However, despite multiple attempts, we failed to successfully  
123 amplify the isoform from the alternative TSS to the canonical stop, suggesting that the  
124 alternative TSS may belong to a truncated isoform of the *HBPI* transcript. Based on PCR and  
125 Sanger sequencing, the truncated isoform is most likely ENST00000497535, which contains the  
126 alternative 5' UTR and first two exons (**Fig. 2A, Supplementary Fig. 2**).

127  
128 After confirming that rs4730222 is transcribed as part of a *HBPI* isoform in osteogenic and  
129 chondrogenic cells (albeit not to the canonical stop), we genotyped rs4730222 in several cell  
130 lines (SW1353, Tc28a/2, Saos-2, chondrogenic progenitor cells) in hopes of identifying a  
131 heterozygous line. As SW1353 was heterozygous for rs4730222, we tested it for allelic  
132 expression imbalance (AEI) of the transcribed SNP. In all three biological replicates, we  
133 observed a significant allelic imbalance (Fisher's exact test,  $p < 1e-5$ ), with the minor allele  
134 showing a 1.3 to 1.4-fold relative enrichment in RNA/DNA compared to the major allele. This  
135 was more modest but directionally concordant with 2.5-fold enrichment of the minor allele in the  
136 reporter assay (**Fig. 2B**).

137  
138 The OA-implicated haplotype at 7q22.3 is a ~500 kb region of high linkage disequilibrium, and  
139 consequently accounts for 283 of the 1,605 SNPs tested here. The observed AEI of the *HBPI*  
140 alternative isoform in SW1353 cells, which are likely heterozygous for the entire OA-associated  
141 haplotype, could be consequent to any or several of these SNPs, or to other forms of genetic  
142 variation. To test whether rs4730222 causally underlies the allelic imbalance of the *HBPI*  
143 alternative transcript, we introduced the minor allele of rs4730222 into Saos-2 cells, which are  
144 homozygous for the major allele, through CRISPR-mediated homology directed repair (HDR).  
145 We generated four biological replicates (*i.e.* independently edited cell populations), and  
146 quantified the RNA-DNA ratio of indel-free reads derived from the major vs. minor allele.  
147 Similar to the SW1353 AEI (1.3 to 1.4-fold), we identified a 1.4 to 1.6-fold relative enrichment  
148 in the RNA/DNA ratio for the minor allele compared to the major allele (Fisher's exact test,  
149  $p < 1e-5$ ; **Fig. 2C**). This confirms that the minor allele at rs4730222 causally underlies  
150 upregulation of the *HBPI* alternative isoform.

151  
152 We next sought to test whether rs4730222 drives increased transcription of the alternative TSS in  
153 osteoarthritic tissue. To do so, we tested for AEI in chondrocytes derived from OA patients. For  
154 each of nine patients heterozygous for rs4730222, we extracted RNA and DNA and amplified  
155 and sequenced the 5'UTR containing the SNP (three technical replicates per patient) from DNA  
156 and cDNA. Despite low cDNA concentrations and low expression of the alternative TSS, we  
157 observed an overall trend in AEI in accordance with our reporter assay and cell models (median  
158 AEI=1.12, Mann Whitney U-test on 27 DNA ratios vs. 27 RNA ratios,  $p=0.003$ ). Interestingly,  
159 one patient appeared to exhibit AEI in the opposite direction<sup>35,36</sup> (**Supplementary Fig. 3**).

160

161 In summary, we set out to functionally test the regulatory effects of 1,605 SNPs that potentially  
162 underlie 35 GWAS signals for osteoarthritis. We succeeded in generating reproducible  
163 measurements of regulatory activity for about two-thirds of the regions tested, and of differential  
164 regulatory activity for about half of the regions tested. The most highly active regions in our  
165 assay were ~2-fold enriched for biochemical marks associated with enhancers. We furthermore  
166 identified six SNPs, which each drove differential expression at an FDR of 5%. The most  
167 significant of these, rs4730222, resides in the 5' UTR of multiple isoforms of *HBPI*, a  
168 transcriptional repressor. The minor, OA-associated risk allele of rs4730222 increases  
169 transcription of alternative isoform(s) of *HBPI*. We validated this finding in SW1353 cells,  
170 CRISPR-edited Saos2 cells, and in chondrocytes derived from knee OA patients.

171  
172 We previously described reduced expression of the canonical *HBPI* transcript in OA tissue,  
173 relative to healthy tissue<sup>29</sup>. Here, we do not observe AEI of the canonical *HBPI* transcript, but  
174 rather AEI of an alternative transcript. We speculate that the impact of rs4730222, wherein the  
175 disease-associated allele consistently increases expression of an alternative transcript,  
176 secondarily reduces expression of canonical *HBPI*. One possibility is that the alternative isoform  
177 encodes a non-coding RNA with an upstream open reading frame (uORF). This isoform of  
178 *HBPI* may have a *trans* effect on the canonical transcript, or have its own, yet uncharacterized,  
179 function in the cell. Additionally, alternative TSSs have been shown to modulate translational  
180 efficiency and tissue specificity of genes<sup>37,38</sup>. Through one or several of these mechanisms, the  
181 expression levels of this isoform might modulate *HBPI* levels in certain tissues. Finally, we note  
182 that the rs4730222-overlapping isoform expressed in SW1353 and Saos2 is a truncated version  
183 of *HBPI*. Therefore, it may disrupt endogenous activity of the gene, *e.g.* by acting as a  
184 dominant-negative. Distinguishing between these mechanistic possibilities for rs4730222 and  
185 *HBPI*, as well as for other MPRA-prioritized OA-associated SNPs, should be a high priority for  
186 the field.

## 187 188 **Acknowledgements**

189 The authors thank the Shendure and Loughlin labs, particularly J. Alexander, M. Gasperini, and  
190 S. Kim, for helpful discussions. This work was funded by grants from the National Institutes of  
191 Health (UM1HG009408, R01CA197139, R01HG006768) to J.S. J.C.K. was supported in part by  
192 1F30HG009479 from the NHGRI. J.S. is an investigator of the Howard Hughes Medical  
193 Institute. S.J.R., C.S. and J.L. were supported by Arthritis Research UK (grant 20771), and by  
194 the Medical Research Council and Arthritis Research UK as part of the MRC-Arthritis Research  
195 UK Centre for Integrated Research into Musculoskeletal Aging (CIMA, grant references JXR  
196 10641, MR/P020941/1 and MR/R502182/1).

## 197 198 **Author Contributions**

199 The project was conceived and designed by J.C.K., A.K., J.S., and J.L. S.J.R. and C.S. collated  
200 and generated the OA patient DNA and cDNA samples. J.L. compiled OA lead variants. J.C.K.

201 and A.K. performed all experiments and analyses. J.C.K., A.K. and J.S. wrote the manuscript.  
202 All authors read and approved the final version of the manuscript.  
203



204 **Main Figures**

205

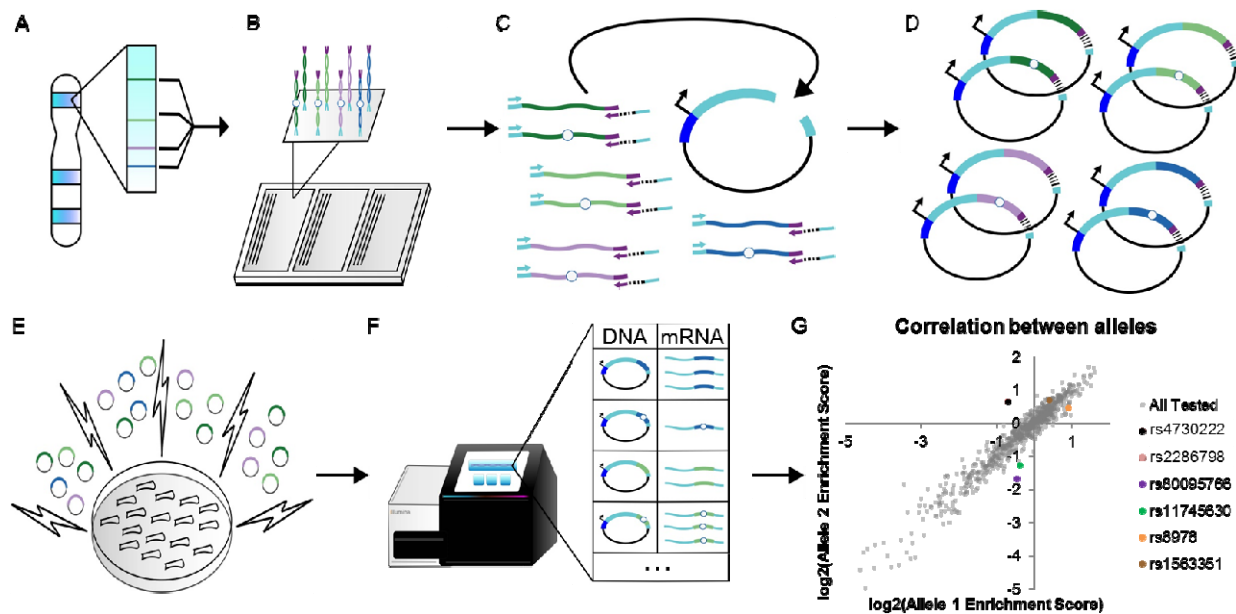

206

207

208 **Figure 1. Schematic and results from massively parallel reporter assay.** A) For each GWAS-  
209 lead SNP, we identified all SNPs in LD with  $r^2 > 0.8$ . Colored lines indicate SNPs in the same  
210 LD block. B) For all SNPs, we extracted 196 nt of genomic sequence centered at the SNP, and  
211 separately synthesized the minor (hollow circle) and major alleles, flanked by common adaptor  
212 sequences (cyan and purple). C-D) We amplified our library from the array via PCR with  
213 primers directed at the common adaptors, in the process appending 5 nt degenerate barcodes  
214 (black lines) and additional sequences homologous to the vector (cyan). We cloned our barcoded  
215 library of all major and minor alleles into the STARR-seq vector. Each putative regulatory  
216 region is cloned into the 3' UTR of a reporter gene (cyan) with a minimal promoter (dark blue).  
217 E) We transfected our library into Saos-2 cells via electroporation. 48 hours post transfection, we  
218 extracted RNA and DNA. F) We determined the abundance of each allele-barcode combination  
219 in the mRNA and DNA population through sequencing. G). For each allele, we calculated one  
220 activity score as the average  $\log_2(\text{RNA}/\text{DNA})$  across all independent measurements. We  
221 identified six SNPs with significantly different activity between the major and minor alleles.  
222

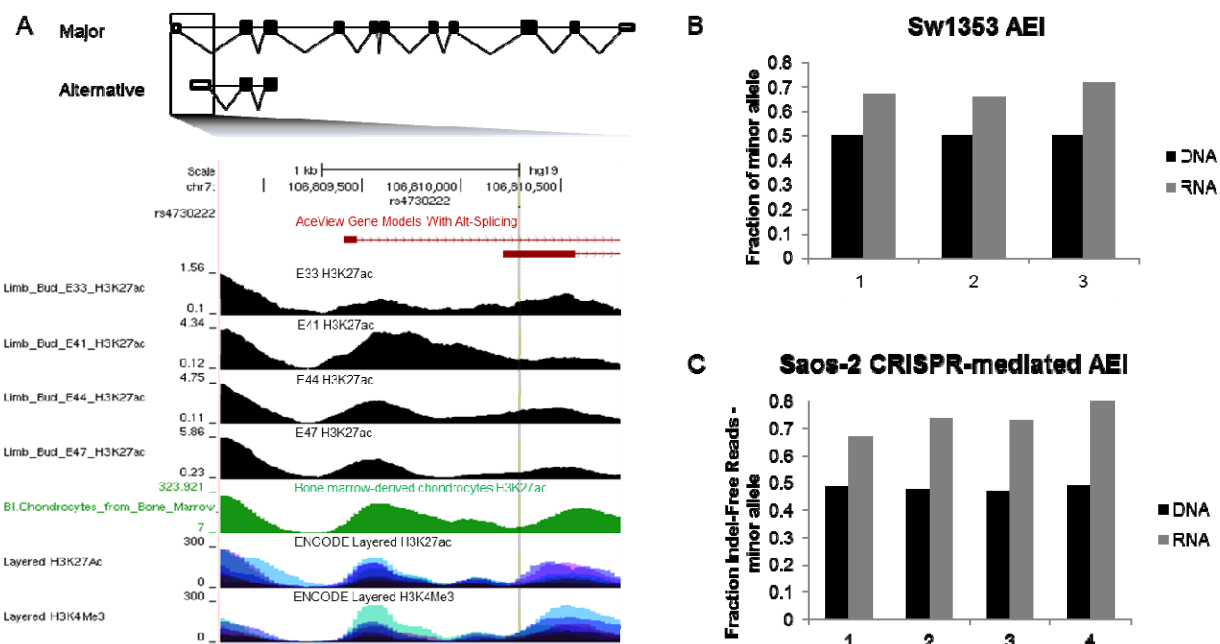

223  
224

225 **Figure 2. Functional Validation of rs4730222.** A) Gene model of *HBPI* ensemble isoform  
226 ENST00000468410 (major) and ENST00000497535 (alternative). UCSC genome browser  
227 zoomed in to the two transcriptional start sites (<http://genome.ucsc.edu>). Rs4730222, within the  
228 5' UTR of the alternative transcript, is indicated by a vertical grey line traversing the annotation  
229 tracks. The four black tracks are H3K27ac performed in human embryonic limb bud at E33, E41,  
230 E44 and E47 respectively<sup>27</sup>. The green track is H3K27ac data from chondrocytes derived from  
231 cultured bone marrow mesenchymal stem cells<sup>28</sup>. Layered H3K27ac is H3K27ac ChIP-seq (a  
232 marker for active enhancers and active promoters) layered from GM12878, H1-hESC, HSMM,  
233 HUVEC, K562, NHEK, and NHLF cells. Layered H3K4me3 is H3K4me3 ChIP-seq (marker for  
234 active promoters) layered from the same seven ENCODE cell lines. B) Allelic expression  
235 imbalance in SW1353, a chondrosarcoma cell line heterozygote for rs4730222. Black bars  
236 represent the fraction of the minor allele in DNA and grey bars indicate the fraction of the minor  
237 allele in cDNA. C) Allelic expression imbalance in Saos-2 cells with the minor allele of  
238 rs4730222 introduced through CRISPR-mediated HDR. Bars are the same as in **Fig. 2B**.

239  
240  
241  
242  
243  
244  
245  
246  
247



| Lead SNP   | Nearest protein coding gene | Ref                | Annotation | #Linked SNPs tested | Significance |
|------------|-----------------------------|--------------------|------------|---------------------|--------------|
| rs6976     | <i>GLT8D1</i>               | <a href="#">9</a>  | 3' UTR     | 280                 | GWS          |
| rs12107036 | <i>TP63</i>                 | <a href="#">9</a>  | intronic   | 1                   | GWSu         |
| rs10948172 | <i>SUPT3H</i>               | <a href="#">9</a>  | intronic   | 213                 | GWSu         |
| rs9350591  | <i>FILIP1</i>               | <a href="#">9</a>  | intergenic | 73                  | GWS          |
| rs3815148  | <i>HBPI</i>                 | <a href="#">10</a> | intronic   | 284                 | GWS          |
| rs4836732  | <i>ASTN2</i>                | <a href="#">9</a>  | intronic   | 2                   | GWS          |
| rs10492367 | <i>KLHDC5</i>               | <a href="#">9</a>  | intergenic | 5                   | GWS          |
| rs835487   | <i>CHST11</i>               | <a href="#">9</a>  | intronic   | 7                   | GWS          |
| rs11842874 | <i>MCF2L</i>                | <a href="#">11</a> | intronic   | 8                   | GWS          |
| rs225014   | <i>DIO2</i>                 | <a href="#">12</a> | exonic     | 19                  | GWSu         |
| rs945006   | <i>DIO3</i>                 | <a href="#">13</a> | 3' UTR     | 1                   | GWSu         |
| rs3204689  | <i>ALDH1A2</i>              | <a href="#">14</a> | 3' UTR     | 52                  | GWS          |
| rs8044769  | <i>FTO</i>                  | <a href="#">9</a>  | intronic   | 8                   | GWSu         |
| rs12982744 | <i>DOT1L</i>                | <a href="#">15</a> | intronic   | 21                  | GWSu         |
| rs6094710  | <i>NCOA3</i>                | <a href="#">16</a> | intergenic | 11                  | GWS          |
| rs143383   | <i>GDF5</i>                 | <a href="#">17</a> | 5' UTR     | 98                  | GWS          |
| rs4764133  | <i>MGP</i>                  | <a href="#">18</a> | intergenic | 137                 | GWS          |
| rs3850251  | <i>ENPP3</i>                | <a href="#">18</a> | intronic   | 6                   | GWSu         |
| rs754106   | <i>LRCH1</i>                | <a href="#">19</a> | intronic   | 10                  | GWSu         |
| rs6766414  | <i>STT3B</i>                | <a href="#">19</a> | intergenic | 29                  | GWSu         |
| rs2862851  | <i>TGFA</i>                 | <a href="#">20</a> | intronic   | 25                  | GWS          |
| rs10471753 | <i>PIK3R1</i>               | <a href="#">20</a> | intergenic | 29                  | GWS          |
| rs2236995  | <i>SLBP</i>                 | <a href="#">20</a> | intronic   | 4                   | GWS          |
| rs496547   | <i>TREH</i>                 | <a href="#">20</a> | intergenic | 3                   | GWS          |
| rs4867568  | <i>LSP1P3</i>               | <a href="#">21</a> | intergenic | 6                   | GWSu         |
| rs788748   | <i>IGFBP3</i>               | <a href="#">22</a> | intergenic | 10                  | GWSu         |
| rs12901499 | <i>SMAD3</i>                | <a href="#">23</a> | intronic   | 28                  | GWSu         |
| rs4907986  | <i>COL11A1</i>              | <a href="#">24</a> | intronic   | 23                  | GWSu         |
| rs1241164  | <i>COL11A1</i>              | <a href="#">24</a> | intronic   | 29                  | GWSu         |
| rs833058   | <i>VEGF</i>                 | <a href="#">24</a> | intergenic | 1                   | GWSu         |
| rs10116772 | <i>GLIS3</i>                | <a href="#">25</a> | intronic   | 8                   | GWS          |
| rs2820436  | <i>ZC3H11B</i>              | <a href="#">26</a> | intronic   | 43                  | GWS          |
| rs11335718 | <i>ANXA3</i>                | <a href="#">26</a> | intronic   | 1                   | GWS          |
| rs11780978 | <i>PLEC</i>                 | <a href="#">26</a> | intronic   | 110                 | GWS          |
| rs2521349  | <i>MAP2K6</i>               | <a href="#">26</a> | intronic   | 20                  | GWS          |

248  
249  
250  
251

**Supplementary Table 1. Lead SNPs.** List of 20 genome-wide significant (GWS) and 15 genome-wide suggestive (GWSu) variants compiled in May 2017.

252 **Supplementary Figures**

253

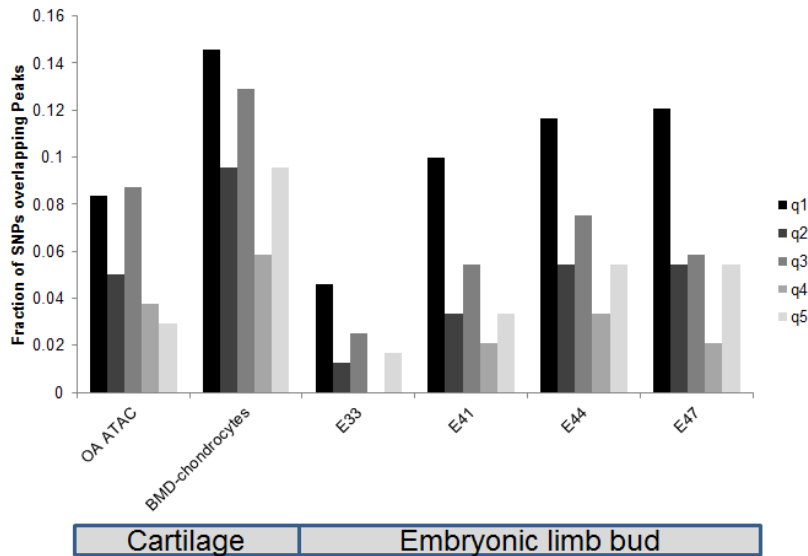

254

255

256 **Supplementary Figure 1. Overlap between tested sequences and enhancer marks.** The 1,203  
257 SNPs were split into 5 quintiles of ~240 sequences each, based on their normalized RNA/DNA  
258 activity score. Q1 refers to the sequences with the highest activity scores and q5 refers to the  
259 sequences with the lowest activity scores. We then overlapped each quintile with peaks called  
260 from OA ATAC-seq<sup>33</sup>, BMD-chondrocytes H3K27ac ChIP-seq<sup>28</sup>, and human embryonic limb  
261 bud H3K27ac ChIP-seq from E33, E41, E44, and E45<sup>27</sup>. Y-axis is the fraction of the 240 SNPs  
262 in each quintile overlapping peaks.

263

264

265

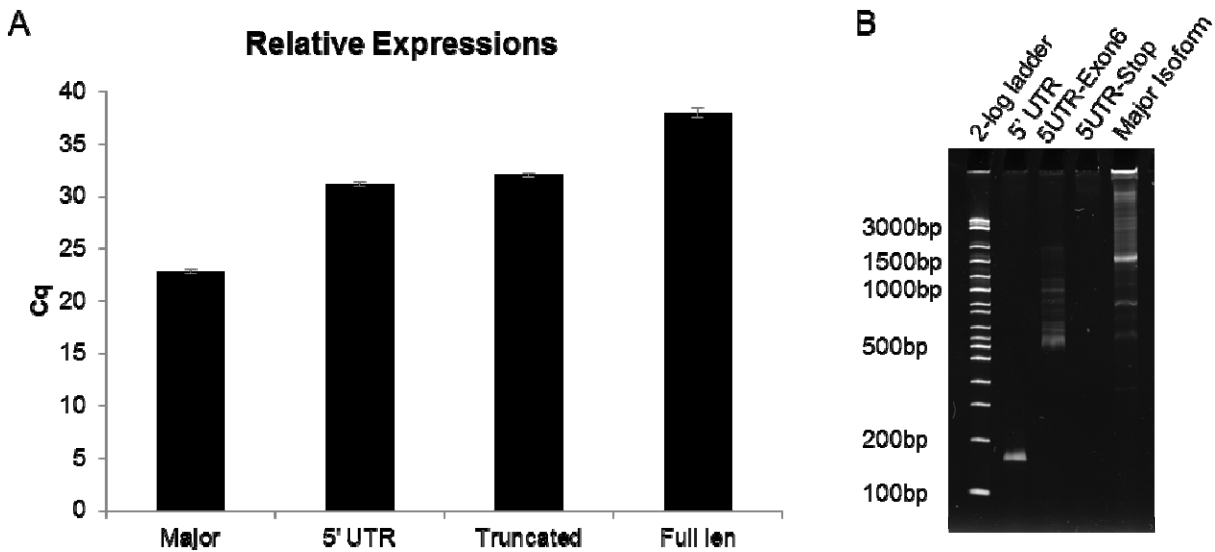

266

267

268 **Supplementary Figure 2. Relative expression of different HBP1 isoforms.** A) Y axis is the

269 Cq value from RT-qPCR from SW1353 cells. The major allele uses a forward primer at the start

270 codon and reverse primer at the conserved stop codon of the major isoforms. The 5' UTR primer

271 set amplifies a short product, entirely within the alternative 5' UTR. The truncated primer set

272 amplifies both ENST00000497535 and ESNT00000485846. The full length primer set includes a

273 forward primer in the alternative TSS and reverse primer at the stop codon of the major isoform.

274 We do not identify any full length product utilizing the alternative TSS. B) Gel of qPCR

275 products. First lane is a 2-log ladder. Second lane is the 5' UTR amplification. Expected size is

276 156 bp. Third lane is the truncated amplification. The primer set should amplify both

277 ENST00000497535 (expected size 548bp) and ESNT00000485846 (expected size 846bp).

278 However, ENST00000485846 contains an internal exon while ESNT00000497535 does not. We

279 ran the PCR product on a gel and Sanger sequenced the purified PCR product, which did not

280 include the internal exon. Fourth lane is amplifying from the alternative 5' UTR to canonical

281 stop. There was no amplification product. Fifth lane is the major isoform (amplifying from

282 canonical start to canonical stop. Expected size is 1,455 bp.

283

284

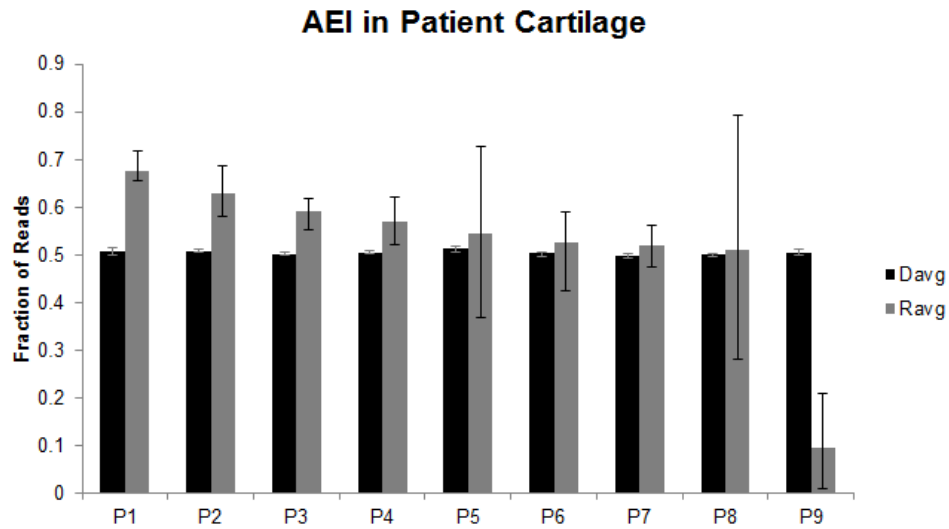

285

286

287

288

289

290

**Supplementary Figure 3.** Allelic Expression Imbalance (AEI) in cartilage from patients receiving total knee replacements. Black bars are the fraction of DNA reads aligning to the minor allele. Grey bars are the fraction of RNA reads aligning to the minor allele. Bars indicate the minimum and maximum fraction from three technical replicates.

## 291 **Methods**

292

### 293 **Identification and design of target SNPs**

294 We selected SNPs that had a minor allele frequency >5% and had been reported as being  
295 associated with OA in European populations at a significance level that surpassed or approached  
296 the genome-wide threshold of  $<5e-8$ . The deadline date for inclusion was May 2017. In total, 35  
297 SNPs were identified, each representing an independent association signal (Table S1). We ran  
298 rAGGr on our list of 35 candidate SNPs to identify all variants with a minimum minor allele  
299 frequency  $\geq 0.001$  in linkage disequilibrium with an  $r^2 > 0.8$  in Europeans  
300 (CEU+FIN+GBR+IBS+TSI) based on 1000 Genomes, Phase 3, Oct 2014. We then filtered out  
301 any polymorphisms greater than one nucleotide, resulting in a list of 1,605 SNPs. For each  
302 variant, we extracted 196 nt of genomic sequence centered around the SNP using BEDTOOLS  
303 getfasta, and edited the SNP to create both the minor and major alleles (3,210 sequences). To  
304 each 196 nt sequence, we appended HSS\_clon\_F (5' - TCTAGAGCATGCACCGG - 3') to the  
305 5' end and DO\_R6 (5'- GCCGGTCAGAATGATGG -3') to the 3' end. We then ordered the  
306 3,210 sequences in duplicate as part of an Agilent 244K 230-mer array.

307

### 308 **Library Generation**

309 We amplified our sequences off of the Agilent array with HSS\_clon\_F and R6\_5N\_HSSR (5'-  
310 CCGGCCGAATTCGTCGANNNNCCATCATTCTGACCGGC -3') using KAPA HiFi  
311 HotStart ReadyMix in a 50 uL reaction with 0.75 ng DNA and SYBR Green on a MiniOpticon  
312 Real-Time PCR system (Bio-Rad) and stopped the reaction before plateauing (13 cycles). This  
313 reaction amplified our library, added a 5 nt degenerate barcode to each sequence, and added both  
314 adapters for cloning into the human STARR-seq vector. We purified the PCR product using a  
315 1.5x AMPure cleanup following manufacturer's protocol. We then ligated 6 ng of our purified  
316 PCR into 25 ng of linearized human STARR-seq backbone using the NEBuilder HiFi DNA  
317 Assembly Cloning Kit following manufacturer's protocol. We transformed 1.2 uL of the ligation  
318 product in 50 uL of NEB C3020 cells, grew up overnight in 100 mL of LB+Amp, and extracted  
319 the library using a Zymo Research ZymoPURE Plasmid Midiprep Kit.

320

### 321 **STARR-seq Screen**

322 We transfected 1.5 million Saos-2 cells with 20 ug of our library in triplicate using the Thermo  
323 Fisher Scientific Neon Transfection System with resuspension buffer R at 1250V, 40ms, 1 shock,  
324 with 100 uL pipettes, in triplicate. After electroporation, we added the cells to 10cm plates with  
325 pre-warmed media (McCoy's 5A with 10% FBS and 1x Pen/Strep). 48 hours post transfection,  
326 we extracted both DNA and RNA from each replicate using the Qiagen ALLPrep DNA/RNA  
327 Mini Kit. DNA was eluted in 80 uL and RNA was eluted in 30 uL. RNA was treated with  
328 Thermo Fisher Scientific TURBO DNase following manufacturer's protocol and reverse  
329 transcribed using Thermo Fisher Scientific SuperScript III Reverse Transcriptase in a 20 uL  
330 reaction with 8 uL of RNA. For each replicate, we amplified DNA in two reactions, each with 2

331 ug of DNA using NEBNext High Fidelity 2X PCR Master Mix with primers HSS\_NF\_pu1 (5'-  
332 CTAATGGCTGTGAGAGAGCTCAGGTACAACCTGATCTAGAGCATGCACC -3') and  
333 HSS\_R\_pu1.(5'- ACTTTATCAATCTCGCTCCAAACCCTTATCATGTCTGCTCGAAGC -3')  
334 and stopped before plateauing (15 cycles). After PCR, products were purified with a 1.5x  
335 AMPure cleanup, and pooled together. For each replicate, we also amplified cDNA in two  
336 reactions, each with 10 uL of RT product in 50 uL reactions with NEBNext High Fidelity 2X  
337 PCR Master Mix with primers HSS\_F\_pu1 (5'-  
338 CTAATGGCTGTGAGAGAGCTCAGGGGCCAGCTGTTGGGGTGTCCAC-3') and  
339 HSS\_R\_pu1 (5'- ACTTTATCAATCTCGCTCCAAACCCTTATCATGTCTGCTCGAAGC -3')  
340 and stopped before plateauing (18-20 cycles). After PCR, products were purified with a 1.5x  
341 AMPure cleanup, eluted in 50 uL each, and pooled together. For the cDNA samples, we  
342 performed a nested reaction using KAPA HiFi HotStart ReadyMix in a 50 uL reaction with 1 uL  
343 of the pooled outer PCR reaction with HSS-NF-pu1 and pu1R (5'-  
344 ACTTTATCAATCTCGCTCCAAACC -'3) and stopped before plateauing (7 cycles). Reactions  
345 were purified with a 1.5x AMPure cleanup and eluted in 50 uL each. Flow cell adapters and  
346 indexes were added to all DNA and cDNA reactions through an additional round of PCR using  
347 Kapa HiFi HotStart ReadyMix in 50 uL reactions with 1 uL of the first DNA PCR or 1 uL of the  
348 inner cDNA PCR using an indexed pu1\_P5 primer (5'-  
349 AATGATACGGCGACCACCGAGATCTACACNNNNNNNNNACGTAGGCCTAAATGGC  
350 TGTGAGAGAGCTCAG -3') and an indexed pu1\_P7 primer (5'-  
351 CAAGCAGAAGACGGCATAACGAGATNNNNNNNNNGACCGTCCGCACTTTATCAATCT  
352 CGCTCCAAACC -3') and stopped before plateauing (6 cycles). The libraries were sequenced  
353 on an Illumina NextSeq 500/550 v2 300 cycle mid-output kit.

354

### 355 **Analysis of STARR-seq Screen**

356 We aligned all sequencing reads to a reference fasta file of our variants using BWA mem and  
357 extracted reads from error-free molecules<sup>39</sup>. Each variant contained several different 5 nt  
358 barcodes added through PCR. We counted the number of reads from each replicate for each  
359 variant-barcode combination in the DNA and cDNA pool. If there were at least 10 DNA reads  
360 and at least 1 RNA read, we calculated an activity score as the  $\log_2(\text{number of RNA reads from}$   
361  $\text{the variant-barcode combination normalized to the total number of RNA reads, divided by the}$   
362  $\text{number of DNA reads from the variant-barcode combination normalized to the total number of}$   
363  $\text{DNA reads})$ . We then combined all variant-barcode activity scores from each replicate, and for  
364 any variant with at least five different measurements, we averaged the activity score for a final  
365 activity score for each variant. This resulted in activity scores for 1,953 of the 3,210 alleles. 752  
366 of the 1,605 variants contained measurements for both alleles. For each of the 752 variants with  
367 measurements for both alleles, we tested whether the 2 alleles drove different expression by  
368 performing a Mann-Whitney U Test for each variant using SciPy v0.19.1 with Python v2.7.3.  
369 We then performed a Benjamini-Hochberg correction with an FDR = 0.05 to correct for multiple  
370 testing.



371

### 372 **Allelic Imbalance of rs4730222 in SW1353 cells**

373 We first genotyped several osteogenic and chondrogenic cell lines for rs4730222 (SW1353,  
374 Tc28a/2, Saos-2, chondrogenic progenitor cells) using rs4730222\_sangerF (5'-  
375 TACGCAGTTCGAATGAATGGGCTC -3') and rs4730222\_sangerR (5'-  
376 AGCTACAAAACCTGGCTGTCCAC -3'). PCR products were purified with a 1.5x AMPure  
377 cleanup and Sanger sequenced with rs4730222\_sangerF.

378 We then tested for allelic imbalance of rs4730222 in the isoforms expressing the SNP in  
379 SW1353. We performed three independent DNA and RNA extractions using the Qiagen  
380 ALLPrep DNA/RNA Mini Kit. DNA was eluted in 80 uL and RNA was eluted in 30 uL. RNA  
381 was treated with TURBO DNase and reverse transcribed with SuperScript III Reverse  
382 Transcriptase. We then amplified the 5'UTR around rs4730222 from each DNA and cDNA  
383 sample using KAPA HiFi HotStart ReadyMix in a 50 uL reaction with 100 ng DNA or 5 uL  
384 cDNA with HBP1\_5UTR\_F\_pu1 (5'-  
385 CTAAATGGCTGTGAGAGAGCTCAGAGTCCGGGCTGCGGTCACATGATG -3') and  
386 HBP1\_5UTR\_R\_pu1 (5'-  
387 ACTTTATCAATCTCGCTCCAAACCAGCTACAAAACCTGGCTGTCCAC -3') and  
388 stopped DNA reactions at 25 cycles and cDNA reactions at 32 cycles. Products were purified  
389 using a 1.5x AMPure cleanup, and flow cell adapters and indexes were added using an indexed  
390 pu1\_P5 primer and an indexed pu1\_P7 primer. Libraries were spiked into a Miseq v2 300 cycle  
391 run. Reads were aligned to a fasta reference file using BWA mem and the number of perfect  
392 reads coming from both alleles was quantified from both DNA and cDNA from each replicate.

393

### 394 **CRISPR Knock-in of rs4730222 in Saos-2 cells**

395 rs4730222 falls within a potential Cas9 PAM site (5'- ACGCGATGAATGGCGAAAGA GGG -  
396 3'). We therefore designed a guideRNA that would target rs4730222, so that the minor-allele  
397 donor would not be re-cut. We ordered the following oligos from IDT: rs4730222\_guideF (5'-  
398 CACCGACGCGATGAATGGCGAAAGA -3') and rs4730222\_guideR (5'-  
399 AA ACTCTTTTCGCCATTCATCGCGTC -3') and followed the Zhang lab protocol to clone them  
400 into the px458 plasmid (SpCas9-2A-EGFP and single guide RNA).

401 We created our donor vector in two steps. First, we amplified a 1,459 bp region around  
402 rs4730222 with the following primers, which also append 16 bp homologous sequence to puc19  
403 onto each side of the amplicon: HBP1\_puc19F (5'-  
404 TCGGTACCCGGGGATCAAGTAGGAAAGTTTCGGTTGAGGAG -3') and HBP1\_puc19R  
405 (5'- TCGACTCTAGAGGATCAACTGAACAGATGACCGACTCTACC -3). We then cloned  
406 this into a linearized puc19 plasmid using Clontech's In-Fusion HD Cloning Kit following  
407 manufacturer's protocol, transformed into Stellar Competent cells, grew up a single colony and  
408 extracted plasmid using the Zymo Research ZymoPURE Plasmid Midiprep Kit. We then re-  
409 linearized the puc19-HBP1 wild-type plasmid via PCR with puc19\_HBP1-linF (5'-  
410 GTGGGGGATGGACTTGCCGTG -3') and puc19-HBP1-linR (5'-

411 CTCCTCAACCGAAACTTTCCTACTT -3'). We also amplified a small region around  
412 rs4730222, while mutating the SNP, using mut\_insF (5'-  
413 AAGTAGGAAAGTTTCGGTTGAGGAG -3') and mut\_insR (5'-  
414 CCAAGTCCATCCCCACGCTCTTTCGCCATTCATCGCG -3'). We then cloned the mutated  
415 insert into puc19-HBP1-wt using the In-Fusion HD Cloning Kit and grew up a single colony  
416 with the minor allele at rs4730222 flanked by 600-850 bp of homology on each side.  
417 We transfected 1 million Saos-2 cells with 10 ug of our px458-rs4730222 guide and 10 ug of our  
418 donor library containing the minor allele using the Neon Transfection system as described above.  
419 72 hours post transfection, we performed FACS on a BD FACS Aria III to isolate ~150,000  
420 GFP+ cells (transfected with px458), which we then expanded. On day 10 post transfection, we  
421 extracted DNA and RNA, performed reverse transcription with Superscript III, and amplified the  
422 region surrounding rs4730222 from both DNA (using HBP1\_5UTR\_F\_pu1 and  
423 HBP\_DNA\_Routside (5'- TAGGTGGGCAATCCTGGGAGAAGGTAC -3')), and RNA (using  
424 HBP1\_5UTR\_F\_pu1 and HBP\_RNA\_Routside (5'- TGCCAGATTCTGACTCACTATTTGC -  
425 3')) in 50 uL reactions using KAPA HiFi 2x ReadyMix. We then purified the PCR reactions with  
426 a 1.5x AMPure cleanup, eluted in 50 uL, and used 1 uL in a nested reaction with pu1L (5'-  
427 CTAAATGGCTGTGAGAGAGCTCAG -3') and HBP1\_5UTR\_R\_pu1. Reactions were purified  
428 with a 1.5x AMPure cleanup, and flow cell adapters and indexes were added using an indexed  
429 pu1\_P5 primer and an indexed pu1\_P7 primer. Libraries were spiked into a Miseq v2 300 cycle  
430 run. Reads were aligned to a fasta reference file using BWA mem and the number of perfect  
431 reads coming from both alleles was quantified from both DNA and cDNA from each replicate.

432

### 433 **Allelic imbalance of rs4730222 in osteoarthritis patients' chondrocytes**

434 Cartilage tissue samples were obtained from OA patients who had undergone joint replacement  
435 surgery at the Newcastle upon Tyne NHS Foundation Trust hospitals. The Newcastle and North  
436 Tyneside Research Ethics Committee granted ethical approval for the collection, with each donor  
437 providing verbal and written informed consent (REC reference number 14/NE/1212). Our patient  
438 ascertainment criterion

439 has been described in detail previously<sup>40,41</sup>. The cartilage was removed from the joint using a  
440 scalpel and was collected distal to the OA lesion. The tissue samples were stored frozen at -80°C  
441 and ground to a powder using a Retsch Mixermill 200 (Retsch Limited) under liquid nitrogen.  
442 Nucleic acids were then extracted from the ground tissue using TRIzol reagent (Life  
443 Technologies) according to the manufacturer's instructions, with the upper aqueous phase  
444 separated for RNA isolation, while the interphase and lower organic phase were used to isolate  
445 DNA. RNA was reverse transcribed using the SuperScript First-Strand cDNA synthesis kit  
446 (Invitrogen). Matched DNA and cDNA were amplified with KAPA HiFi 2x ReadyMix and  
447 SYBR Green and halted before plateauing. The primers sequences were as follows:  
448 5'-CTAAATGGCTGTGAGAGAGCTCAGAGTCCGGGCTGCGGTCACATGATG-3'; and  
449 5'-ACTTTATCAATCTCGCTCCAAACCAGCTACAAAACCTGGCTGTCCAC-3'.

450 All samples were purified with a 1.5x AMPure cleanup following manufacturer's instructions  
451 and eluted in 50 uL Qiagen Elution Buffer. 1 uL of purified product was then indexed for  
452 Illumina sequencing using an indexed pu1\_P5 primer and an indexed pu1\_P7 primer. Libraries  
453 were spiked into a Miseq v2 300 cycle run. Reads were aligned to a fasta reference file using  
454 BWA mem and the number of aligning reads coming from both alleles was quantified from both  
455 DNA and cDNA from each replicate. For statistical analysis, a Mann Whitney U-test was  
456 performed comparing DNA vs. RNA abundances of the minor allele for the 54 values (27 for  
457 DNA and 27 for RNA; nine patients x three replicates).

458

#### 459 **Characterization of HBP1 rs4730222-containing isoforms**

460 We designed the following set of primers to differentiate between different HBP1 isoforms:  
461 Major (1stExonF: 5'- GTGTGGGAAGTGAAGACAAATCAGATGC -3' and LastExonR: 5'-  
462 CTTCCACCTGTCACCAAGGATCACAC -3'), 5' UTR (UTR\_qPCR\_F: 5'-  
463 CAGTCTCCGCCTTTCAACCTATG -3' and UTR\_qPCR\_R: 5'-  
464 ATGAACTCGAGTGTAGAGTGCACAG -3'), Truncated (UTR\_qPCR\_F and Exon6\_R:  
465 CCACCTCATTTTCACGGTAAGTAG -3') and Full Len (UTR\_qPCR\_F and LastExonR). We  
466 performed technical triplicates for each qPCR using KAPA Robust 2x Hotstart Readymix with  
467 cDNA from wild-type SW1353 cells, letting the reaction go for 40 cycles. We then ran products  
468 on a gel, and differentiated between ENST00000497535 and ENST00000485846 based both on  
469 size and Sanger sequencing.

470

471

472 **REFERENCES**

473

- 474 1. Patwardhan, R. P. *et al.* High-resolution analysis of DNA regulatory elements by synthetic  
475 saturation mutagenesis. *Nat. Biotechnol.* **27**, 1173–1175 (2009).
- 476 2. Patwardhan, R. P. *et al.* Massively parallel functional dissection of mammalian enhancers in  
477 vivo. *Nat. Biotechnol.* **30**, 265–270 (2012).
- 478 3. Melnikov, A. *et al.* Systematic dissection and optimization of inducible enhancers in human  
479 cells using a massively parallel reporter assay. *Nat. Biotechnol.* **30**, 271 (2012).
- 480 4. Arnold, C. D. *et al.* Genome-wide quantitative enhancer activity maps identified by  
481 STARR-seq. *Science* **339**, 1074–1077 (2013).
- 482 5. Tewhey, R. *et al.* Direct Identification of Hundreds of Expression-Modulating Variants  
483 using a Multiplexed Reporter Assay. *Cell* **172**, 1132–1134 (2018).
- 484 6. Ulirsch, J. C. *et al.* Systematic Functional Dissection of Common Genetic Variation  
485 Affecting Red Blood Cell Traits. *Cell* **165**, 1530–1545 (2016).
- 486 7. Liu, S. *et al.* Systematic identification of regulatory variants associated with cancer risk.  
487 *Genome Biol.* **18**, 194 (2017).
- 488 8. Vockley, C. M. *et al.* Massively parallel quantification of the regulatory effects of  
489 noncoding genetic variation in a human cohort. *Genome Res.* **25**, 1206–1214 (2015).
- 490 9. Consortium, A. & Others. arcOGEN Collaborators, Zeggini E, Panoutsopoulou K, Southam  
491 L, Rayner NW, et al. Identification of new susceptibility loci for osteoarthritis (arcOGEN): a  
492 genome-wide association study. *Lancet* **380**, 815–823 (2012).
- 493 10. Kerkhof, H. J. M. *et al.* A genome-wide association study identifies an osteoarthritis  
494 susceptibility locus on chromosome 7q22. *Arthritis Rheum.* **62**, 499–510 (2010).
- 495 11. Day-Williams, A. G. *et al.* A variant in MCF2L is associated with osteoarthritis. *Am. J.*

- 496 *Hum. Genet.* **89**, 446–450 (2011).
- 497 12. Meulenbelt, I. *et al.* Identification of DIO2 as a new susceptibility locus for symptomatic  
498 osteoarthritis. *Hum. Mol. Genet.* **17**, 1867–1875 (2008).
- 499 13. Meulenbelt, I. *et al.* Meta-analyses of genes modulating intracellular T3 bio-availability  
500 reveal a possible role for the DIO3 gene in osteoarthritis susceptibility. *Ann. Rheum. Dis.* **70**,  
501 164–167 (2011).
- 502 14. Styrkarsdottir, U. *et al.* Severe osteoarthritis of the hand associates with common variants  
503 within the ALDH1A2 gene and with rare variants at 1p31. *Nat. Genet.* **46**, 498–502 (2014).
- 504 15. Evangelou, E. *et al.* The DOT1L rs12982744 polymorphism is associated with osteoarthritis  
505 of the hip with genome-wide statistical significance in males. *Ann. Rheum. Dis.* **72**, 1264–  
506 1265 (2013).
- 507 16. Evangelou, E. *et al.* A meta-analysis of genome-wide association studies identifies novel  
508 variants associated with osteoarthritis of the hip. *Ann. Rheum. Dis.* **73**, 2130–2136 (2014).
- 509 17. Miyamoto, Y. *et al.* A functional polymorphism in the 5' UTR of GDF5 is associated with  
510 susceptibility to osteoarthritis. *Nat. Genet.* **39**, 529–533 (2007).
- 511 18. den Hollander, W. *et al.* Genome-wide association and functional studies identify a role for  
512 matrix Gla protein in osteoarthritis of the hand. *Ann. Rheum. Dis.* **76**, 2046–2053 (2017).
- 513 19. Panoutsopoulou, K. *et al.* Radiographic endophenotyping in hip osteoarthritis improves the  
514 precision of genetic association analysis. *Ann. Rheum. Dis.* **76**, 1199–1206 (2017).
- 515 20. Castaño-Betancourt, M. C. *et al.* Novel Genetic Variants for Cartilage Thickness and Hip  
516 Osteoarthritis. *PLoS Genet.* **12**, e1006260 (2016).
- 517 21. Yau, M. S. *et al.* Genome-Wide Association Study of Radiographic Knee Osteoarthritis in  
518 North American Caucasians. *Arthritis Rheumatol* **69**, 343–351 (2017).

- 519 22. Evans, D. S. *et al.* Genome-wide association and functional studies identify a role for  
520 IGFBP3 in hip osteoarthritis. *Ann. Rheum. Dis.* **74**, 1861–1867 (2015).
- 521 23. Valdes, A. M. *et al.* Genetic variation in the SMAD3 gene is associated with hip and knee  
522 osteoarthritis. *Arthritis Rheum.* **62**, 2347–2352 (2010).
- 523 24. Rodriguez-Fontenla, C. *et al.* Assessment of osteoarthritis candidate genes in a meta-  
524 analysis of nine genome-wide association studies. *Arthritis Rheumatol* **66**, 940–949 (2014).
- 525 25. Casalone, E. *et al.* A novel variant in GLIS3 is associated with osteoarthritis. *Ann. Rheum.*  
526 *Dis.* **77**, 620–623 (2018).
- 527 26. Zengini, E. *et al.* Genome-wide analyses using UK Biobank data provide insights into the  
528 genetic architecture of osteoarthritis. *Nat. Genet.* **50**, 549–558 (2018).
- 529 27. Cotney, J. *et al.* The evolution of lineage-specific regulatory activities in the human  
530 embryonic limb. *Cell* **154**, 185–196 (2013).
- 531 28. Herlofsen, S. R. *et al.* Genome-wide map of quantified epigenetic changes during in vitro  
532 chondrogenic differentiation of primary human mesenchymal stem cells. *BMC Genomics*  
533 **14**, 105 (2013).
- 534 29. Raine, E. V. A., Wreglesworth, N., Dodd, A. W., Reynard, L. N. & Loughlin, J. Gene  
535 expression analysis reveals HBP1 as a key target for the osteoarthritis susceptibility locus  
536 that maps to chromosome 7q22. *Ann. Rheum. Dis.* **71**, 2020–2027 (2012).
- 537 30. Luyten, F. P., Tylzanowski, P. & Lories, R. J. Wnt signaling and osteoarthritis. *Bone* **44**,  
538 522–527 (2009).
- 539 31. Berasi, S. P., Xiu, M., Yee, A. S. & Paulson, K. E. HBP1 repression of the p47phox gene:  
540 cell cycle regulation via the NADPH oxidase. *Mol. Cell. Biol.* **24**, 3011–3024 (2004).
- 541 32. Scott, J. L. *et al.* Superoxide dismutase downregulation in osteoarthritis progression and



- 542 end-stage disease. *Ann. Rheum. Dis.* **69**, 1502–1510 (2010).
- 543 33. Liu, Y. *et al.* Chromatin accessibility landscape of articular knee cartilage reveals aberrant  
544 enhancer regulation in osteoarthritis. *bioRxiv* 274043 (2018). doi:10.1101/274043
- 545 34. Thierry-Mieg, D., Thierry-Mieg, J. & NCBI/NLM/NIH. AceView: Gene:HBP1, a  
546 comprehensive annotation of human, mouse and worm genes with mRNAs or  
547 ESTsAceView. Available at:  
548 <https://www.ncbi.nlm.nih.gov/IEB/Research/Acembly/av.cgi?db=36a&c=Gene&l=HBP1>.  
549 (Accessed: 9th June 2018)
- 550 35. Gee, F., Rushton, M. D., Loughlin, J. & Reynard, L. N. Correlation of the osteoarthritis  
551 susceptibility variants that map to chromosome 20q13 with an expression quantitative trait  
552 locus operating on NCOA3 and with functional variation at the polymorphism rs116855380.  
553 *Arthritis & Rheumatology* **67**, 2923–2932 (2015).
- 554 36. Shepherd, C. *et al.* Functional characterisation of the osteoarthritis genetic risk residing at  
555 ALDH1A2 identifies rs12915901 as a key target variant. *Arthritis Rheumatol* (2018).  
556 doi:10.1002/art.40545
- 557 37. Wang, X., Hou, J., Quedenau, C. & Chen, W. Pervasive isoform-specific translational  
558 regulation via alternative transcription start sites in mammals. *Mol. Syst. Biol.* **12**, 875  
559 (2016).
- 560 38. Reyes, A. & Huber, W. Alternative start and termination sites of transcription drive most  
561 transcript isoform differences across human tissues. *Nucleic Acids Res.* **46**, 582–592 (2018).
- 562 39. Li, H. Aligning sequence reads, clone sequences and assembly contigs with BWA-MEM.  
563 *arXiv [q-bio.GN]* (2013).
- 564 40. Southam, L. *et al.* An SNP in the 5'-UTR of GDF5 is associated with osteoarthritis

565 susceptibility in Europeans and with in vivo differences in allelic expression in articular  
566 cartilage. *Hum. Mol. Genet.* **16**, 2226–2232 (2007).

567 41. Egli, R. J. *et al.* Functional analysis of the osteoarthritis susceptibility-associated GDF5  
568 regulatory polymorphism. *Arthritis Rheum.* **60**, 2055–2064 (2009).

569
